# Supplementary material for: Polyphyllin II inhibits human bladder cancer migration and invasion by regulating EMT-associated factors and MMPs
Source: PubMed Central journal article supplement — Oncol Lett. 2020 Jul 9;20(3):2928–36. doi: 10.3892/ol.2020.11839 (PMC7399771; doi:10.3892/ol.2020.11839), 2020-07-09

Figure S1. Viability of bladder cancer cells treated with traditional Chinese herbs. (A) Cisplatin was used as positive control. Heat-clearing and detoxifying herbs including (B) PPE, (C) *Scutellaria Barbata*, (D) *Pulsatillae* decoction, (E) Dahuang Huanglian Xiexin decoction, (F) Bazhengsan and (G) *Hedyotis diffusa* combined with *S. Barbata* (G) were applied to screen drugs for bladder cancer cells. Values represent the mean  $\pm$  SEM of at least three individual experiments. PPE, ethanol extracts of *Paris polyphylla*.

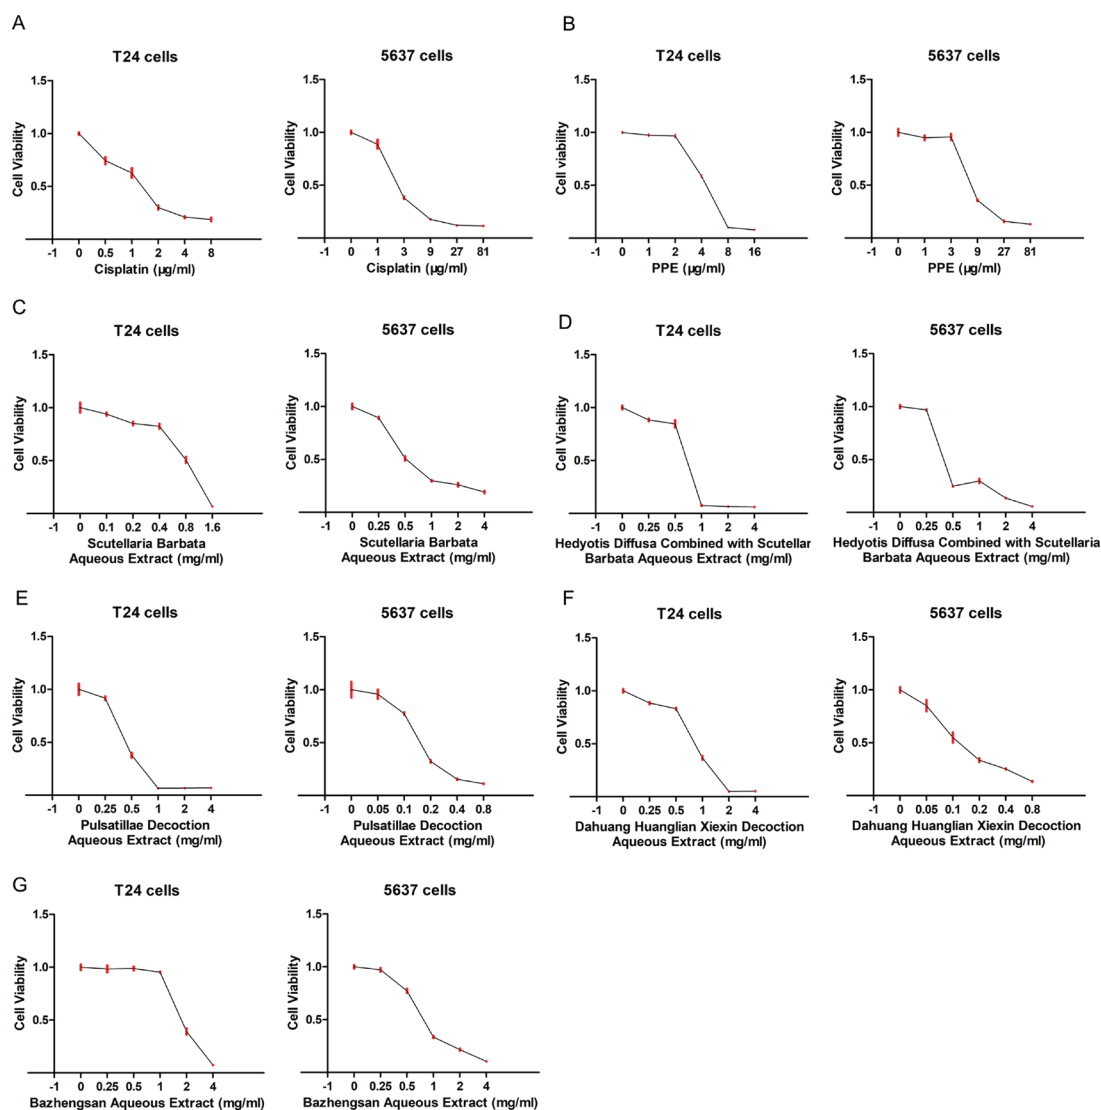

Figure S2. Viability of bladder cancer cells treated with active components of PPE. (A) Cisplatin was used as positive control. The active components of PPE (B) PPI, (C) PPII, (D) PPVI and (E) PPVII were applied to identify the compound with the highest sensitivity in bladder cancer cells. Experiments were conducted at least three individual times. The bars represent the values of SEM. PPE, ethanol extracts of *Paris polyphylla*; PP, polyphyllin.

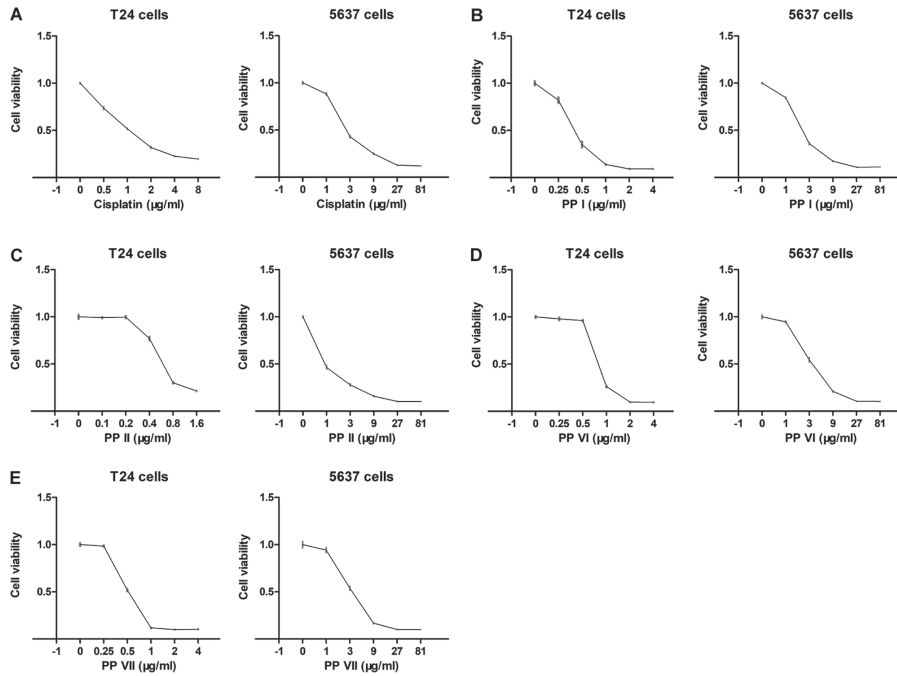

Supplement: Supplementary_Data.pdf [file Supplementary_Data.pdf]
